# Supplementary material for: Application of Artificial Intelligence Methods for Imaging of Spinal Metastasis
Source: MDPI journal article supplement (doi:10.3390/cancers14164025), 2022-08-20
Supplement: s1 [file s1]

## Supplementary Figure S1.

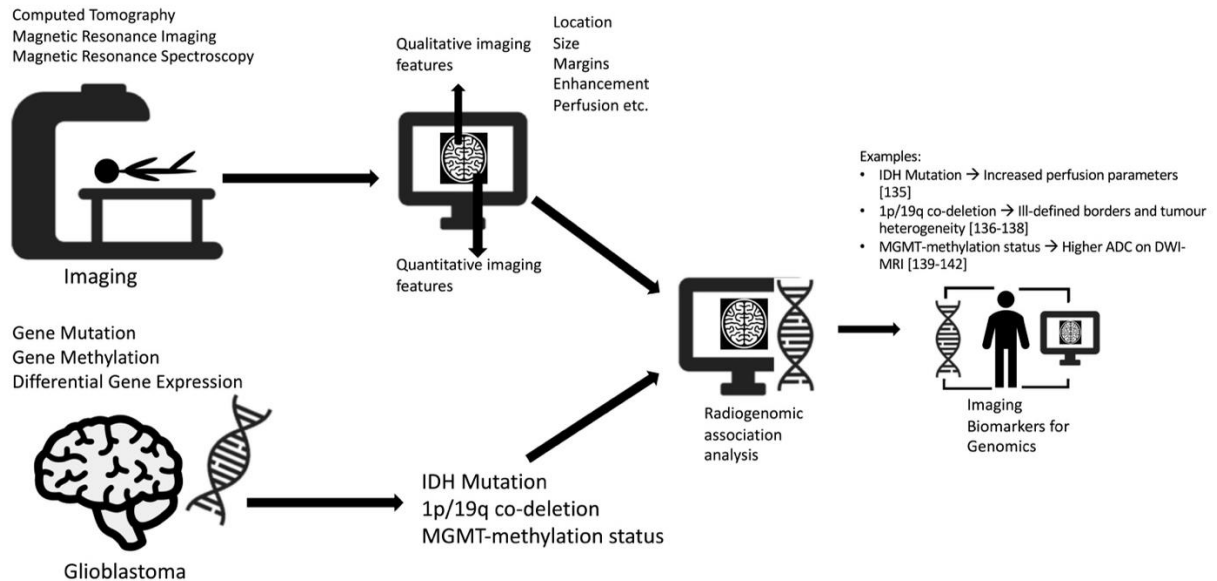

Supplementary Figure S1. Diagram showing an example of radiogenomics framework for glioblastoma (brain tumour), how imaging biomarkers are derived and used to predict genomics such as IDH-mutation [135], 1p/19q co-deletion[136-138] and MGMT-methylation status [139-142].
